# Supplementary material
Source: PubMed Central journal article supplement (PMC5812440)
Supplement: NIHMS75297-supplement-Supplemental_material.pdf [file NIHMS75297-supplement-Supplemental_material.pdf]

## Supplemental Material

Table S1. *E4bp4* interacting partners from yeast-two-hybrid screen

| Gene Name | Positive clones | Protein function                     |
|-----------|-----------------|--------------------------------------|
| C18orf25  | 1               | Unknown                              |
| CHD1      | 1               | DNA helicase binding protein         |
| DSP       | 2               | Cytoskeletal protein                 |
| FLJ13057  | 5               | Unknown                              |
| FLJ544447 | 1               | Unknown                              |
| FLNA      | 1               | Cytoskeletal protein                 |
| HIPK1     | 1               | Serine/threonine protein kinase      |
| HIPK3     | 5               | Serine/threonine protein kinase      |
| PIAS1     | 20              | SUMO E3 ligase                       |
| PIAS3     | 2               | SUMO E3 ligase                       |
| RANBP2    | 1               | SUMO E3 ligase                       |
| RNF111    | 1               | SUMO-targeted ubiquitin ligase       |
| SETX      | 2               | DNA helicase                         |
| SNRP70    | 2               | Splicesomal ribonucleoprotein        |
| SORL1     | 1               | Neuronal apolipoprotein E receptor   |
| TLK2      | 2               | Tousled-like serine/threonine kinase |
| U5-200KD  | 1               | RNA helicase                         |
| ZBTB16    | 1               | Zinc finger transcription factor     |
| ZMYM5     | 5               | Zinc Finger MYM-Type Protein         |
| ZNF198    | 5               | Zinc Finger Transcriptional cofactor |
| ZNF237    | 5               | Zinc Finger Transcriptional cofactor |

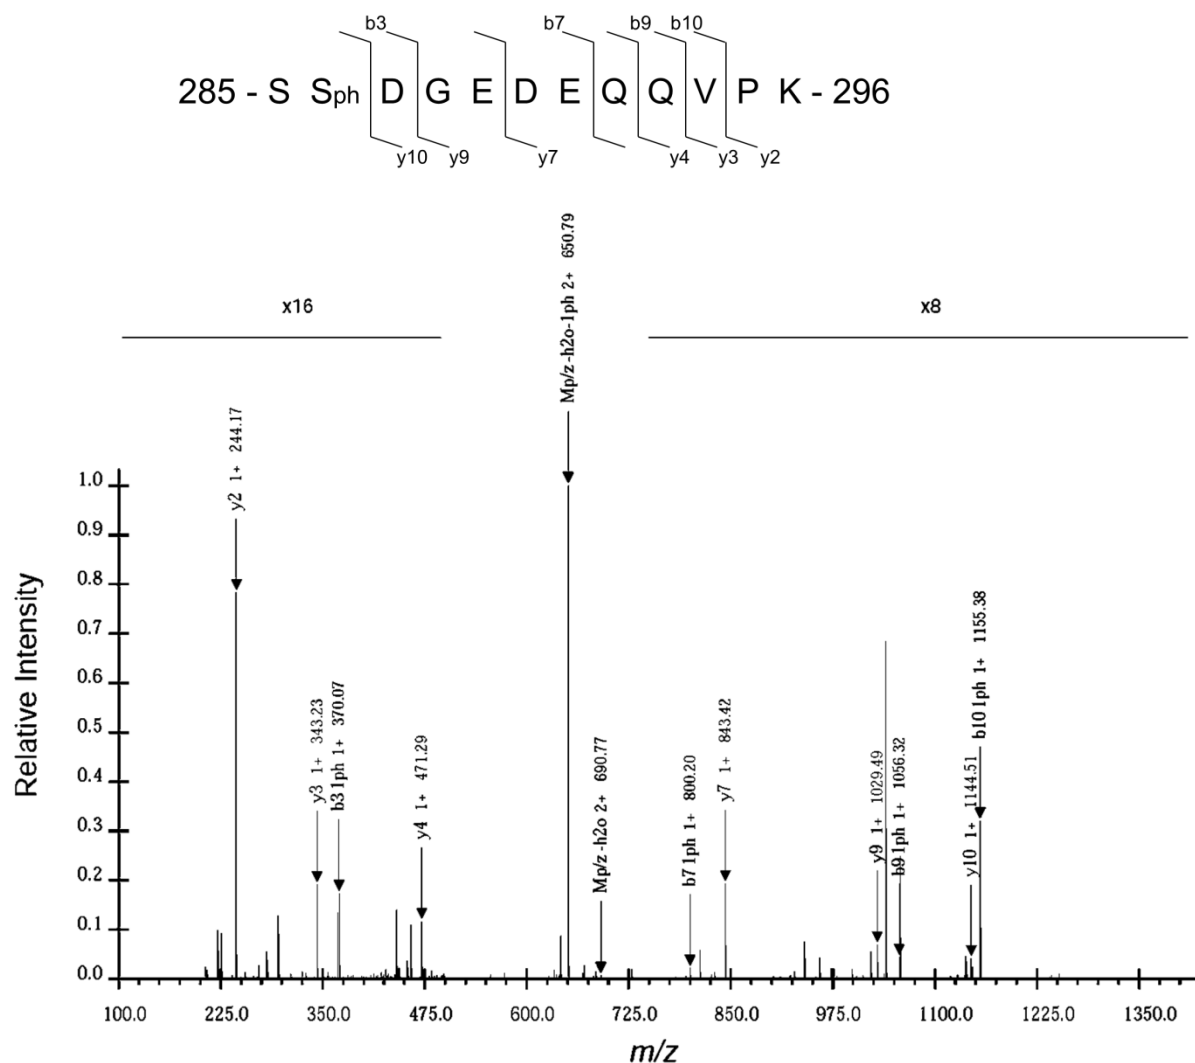

*Figure S1. Annotated CID tandem mass spectrum for S286 E4bp4 peptide*

Annotated CID tandem mass spectrum of the +2 ion at  $m/z$  699.77, confirming phosphorylation of E4bp4 at S286. Tandem mass spectra acquired with an electrospray ionization LTQ/Orbitrap mass spectrometer from purified FLAG-E4bp4. FLAG-E4bp4 was expressed in HEK-293T cells and purified by immunoprecipitation with anti-FLAG M2 affinity resin and the purified protein competitively eluted using 3X FLAG peptide. Purified E4bp4 was digested with trypsin and subjected to phosphopeptide enrichment using  $\text{TiO}_2$  beads to reduce background from unphosphorylated E4bp4 peptides. Magnification of certain regions of the spectra is highlighted. Above spectra is schematic representation of fragmented peptide with identified ions labelled.

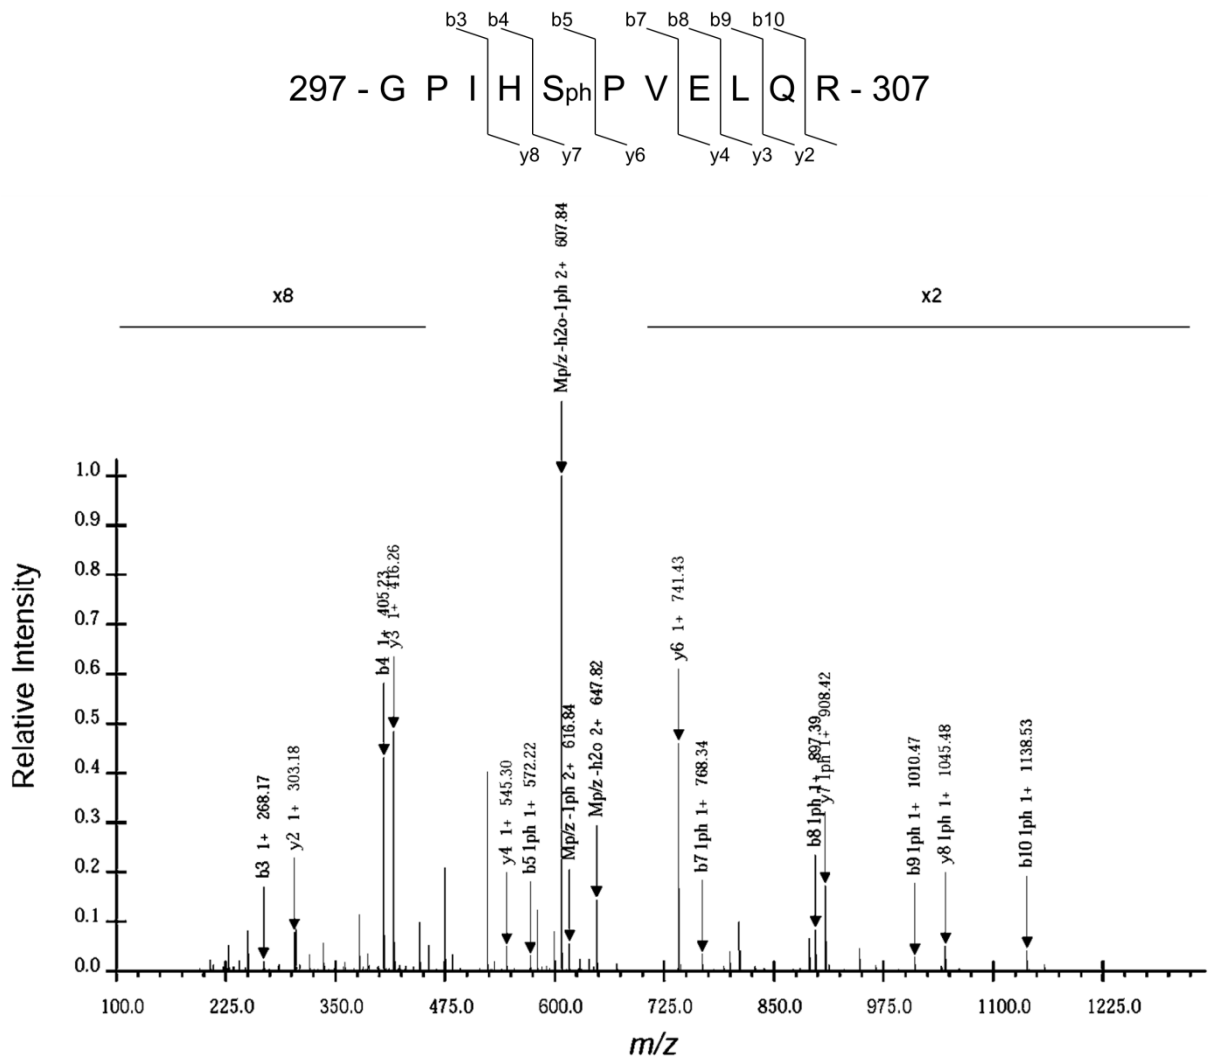

Figure S2. Annotated CID tandem mass spectrum for S301 E4bp4 peptide

Annotated CID tandem mass spectrum of the +2 ion at  $m/z$  656.83, confirming phosphorylation of E4bp4 at S301. Tandem mass spectra acquired with an electrospray ionization LTQ/Orbitrap mass spectrometer from purified FLAG-E4bp4. FLAG-E4bp4 was expressed in HEK-293T cells and purified by immunoprecipitation with anti-FLAG M2 affinity resin and the purified protein competitively eluted using 3X FLAG peptide. Purified E4bp4 was digested with trypsin and subjected to phosphopeptide enrichment using  $\text{TiO}_2$  beads to reduce background from unphosphorylated E4bp4 peptides. Magnification of certain regions of the spectra is highlighted. Above spectra is schematic representation of fragmented peptide with identified ions labelled.

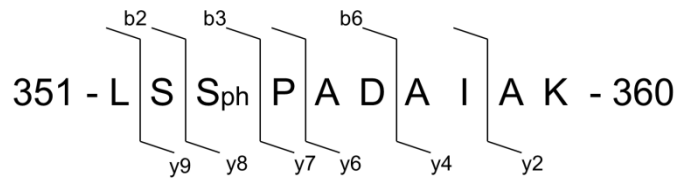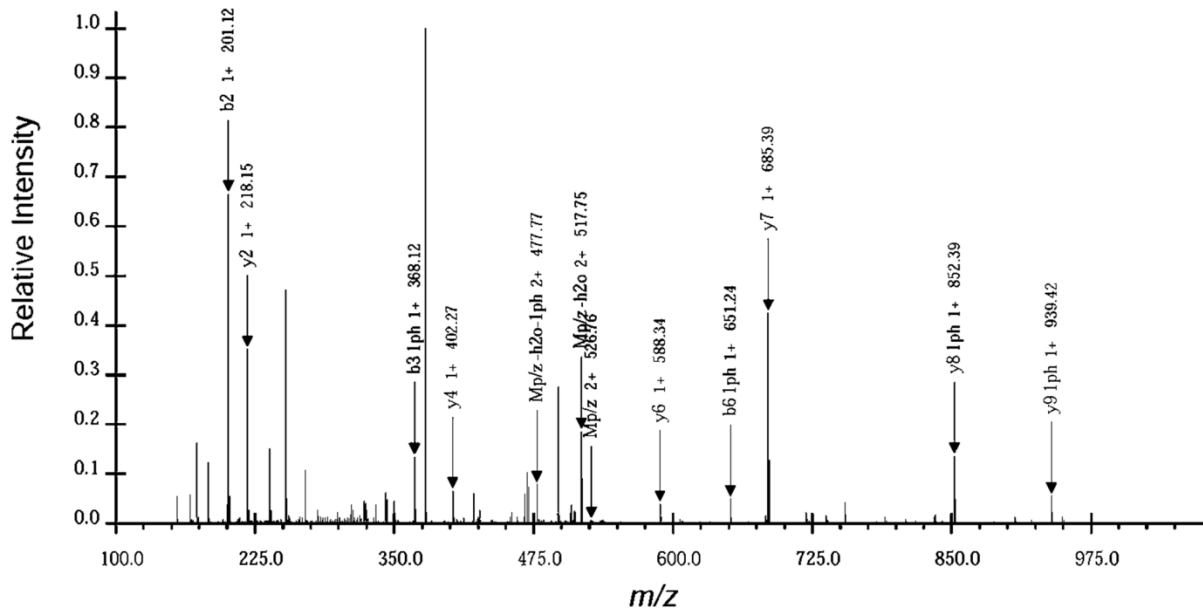

Figure S3. Annotated CID tandem mass spectrum for S353 E4bp4 peptide

Annotated CID tandem mass spectrum of the +2 ion at m/z 526.76, confirming phosphorylation of E4bp4 at S301. Tandem mass spectra acquired with an electrospray ionization LTQ/Orbitrap mass spectrometer from purified FLAG-E4bp4. FLAG-E4bp4 was expressed in HEK-293T cells and purified by immunoprecipitation with anti-FLAG M2 affinity resin and the purified protein competitively eluted using 3X FLAG peptide. Purified E4bp4 was digested with trypsin and subjected to phosphopeptide enrichment using TiO<sub>2</sub> beads to reduce background from unphosphorylated E4bp4 peptides. Magnification of certain regions of the spectra is highlighted. Above spectra is schematic representation of fragmented peptide with identified ions labelled.
